# Supplementary material for: Integrating between-host transmission and within-host immunity to analyze the impact of varicella vaccination on zoster
Source: eLife. 2015 Jul 11;4:e07116. doi: 10.7554/eLife.07116 (PMC4530225; doi:10.7554/eLife.07116)
Supplement: Figure 1—source data 1. — DOI: http://dx.doi.org/10.7554/eLife.07116.005 [file elife07116s001.xlsx]

## Sheet: Sheet1
Age group	HZ incidence per person-year
1	0.00114125158059115
2	0.000657482490257668
3	0.00116632567020923
4	0.0011878374259993
5	0.00203077413516353
6	0.00167621954191314
7	0.00182869346004776
8	0.00280594187172148
9	0.00344921917502294
10	0.00114280082936823
11	0.00260066462678285
12	0.00275950039770492
13	0.00224347944693663
14	0.00249393023668966
15	0.00272714242320152
16	0.00269025350627246
17	0.00240547132882105
18	0.00227691348218042
19	0.0019984790346287
20	0.00308279899127024
21	0.00233764463630852
22	0.00248841762309943
23	0.00216704259047108
24	0.00106527457278332
25	0.00162965068492912
26	0.00217299070184092
27	0.00200611923430684
28	0.00186481449100821
29	0.00101620452957762
30	0.00232385621939392
31	0.00175822393881365
32	0.00174754507122876
33	0.000860131935254781
34	0.00220417342893466
35	0.0017306694948654
36	0.00168785602354706
37	0.0017955753864491
38	0.00243013254306901
39	0.00204561019867838
40	0.000888197522630199
41	0.00172781745546916
42	0.00215472286834223
43	0.00177689071201991
44	0.00201832056429258
45	0.00275684929045633
46	0.00218498639672057
47	0.00303862906729004
48	0.00392348936875899
49	0.00348513916885937
50	0.00229689442802541
51	0.00401297282482094
52	0.00395483375781449
53	0.00390196352838835
54	0.00438759698997982
55	0.00352181817710232
56	0.00414750595969115
57	0.00421510509486531
58	0.00479539127654355
59	0.00409530525713776
60	0.00556165590330925
61	0.00559623647622358
62	0.00511861818313086
63	0.00751555306047618
64	0.00801746874489608
65	0.00650923271021441
66	0.00506546362975461
67	0.00449799591839852
68	0.00763162057736137
69	0.00736715216148773
70	0.00957278090464298
71	0.00780667184728924
72	0.00814703552783768
73	0.0069581970160032
74	0.00738156484537016
75	0.00528128878099805
76	0.00947185234367596
77	0.00948418293001384
78	0.0110428691646745
79	0.00978097556761935
80	0.0128185898793185
